# Supplementary material for: Ruthenium oxide-based nanocomposites with high specific surface area and improved capacitance as a supercapacitor
Source: Royal Society of Chemistry journal article supplement (doi:10.1039/c4ra07044e), 2014-01-01
Supplement: c4ra07044e1.pdf [file c4ra07044e1.pdf]

## Electronic Supplementary Information

### **Ruthenium oxide-based nanocomposites with high specific surface area and improved capacitance as a supercapacitor**

Pengfei Wang<sup>a,b</sup>, Hui Liu<sup>a</sup>, Qiangqiang Tan<sup>a,\*</sup>, and Jun Yang<sup>a,\*</sup>

<sup>a</sup> State Key Laboratory of Multiphase Complex Systems, Institute of Process Engineering, Chinese Academy of Sciences, Beijing, China 100190. Tel.: 86-10-6252 9377; Fax: 86-10-8254 5008; E-mail: [qtan@ipe.ac.cn](mailto:qtan@ipe.ac.cn) (Q.T.); Fax: 86-10-8254 4814; Tel: 86-10-8254 4915; E-mail: [jyang@ipe.ac.cn](mailto:jyang@ipe.ac.cn) (J.Y.)

<sup>b</sup> University of Chinese Academy of Sciences, No. 19A Yuquan Road, Beijing, 100049, China

Financial support from the Knowledge Innovation Program of the Chinese Academy of Sciences (Grant No. KG CX2-YW-341), the 100 Talents Program of the Chinese Academy of Sciences, National Natural Science Foundation of China (Grant No.: 21173226, 21376247), and State Key Laboratory of Multiphase Complex Systems, Institute of Process Engineering, Chinese Academy of Sciences (MPCS-2012-A-11) is gratefully acknowledged.

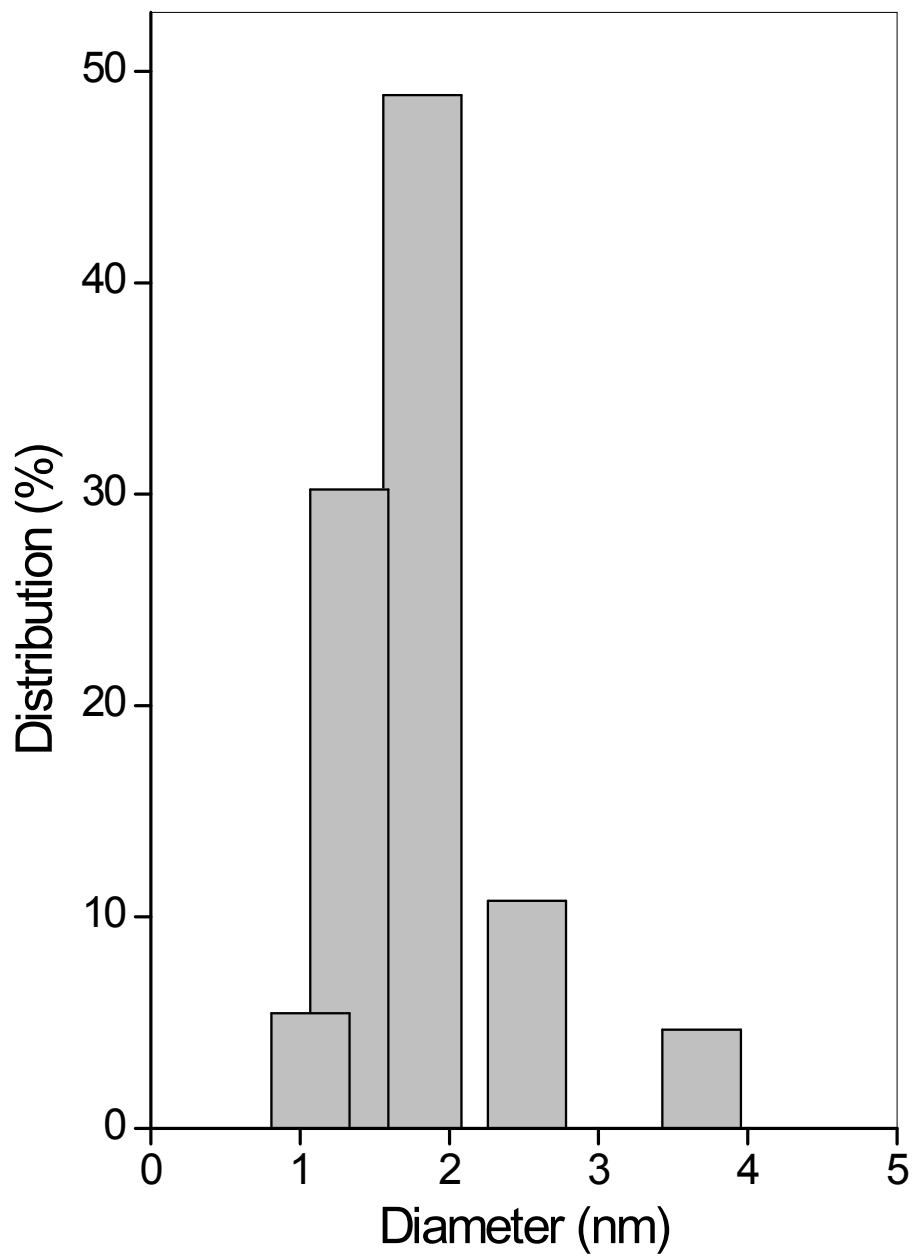

**Fig. S1.** Histogram of RuO<sub>2</sub>/C nanocomposites derived from a solvothermal approach:  $\bar{d} = 1.80$  nm,  $\sigma = 0.33$  nm,  $\bar{\sigma} = 16.5\%$ .

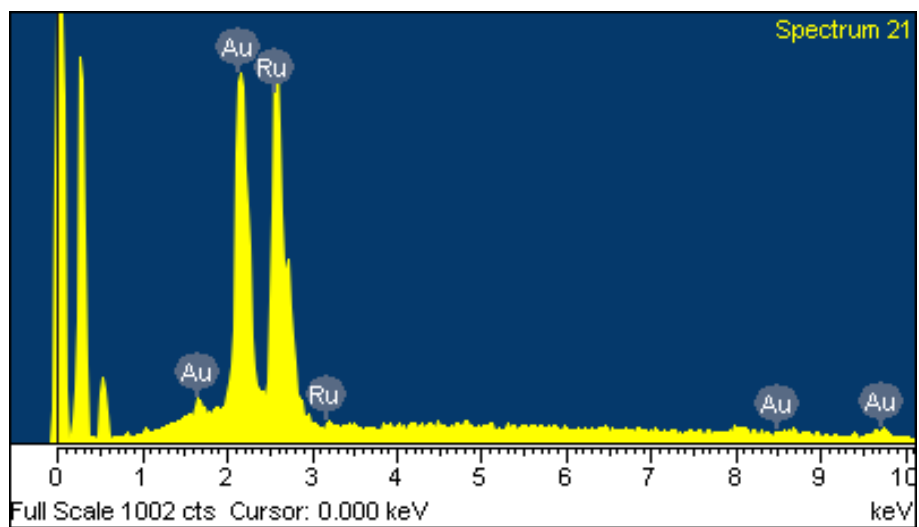

**Fig. S2.** A typical EDX image of the precipitates obtained from the mixture of aqueous  $\text{RuCl}_3$  and  $\text{HAuCl}_4$  solution with Ru/Au molar ratio of 3/1.

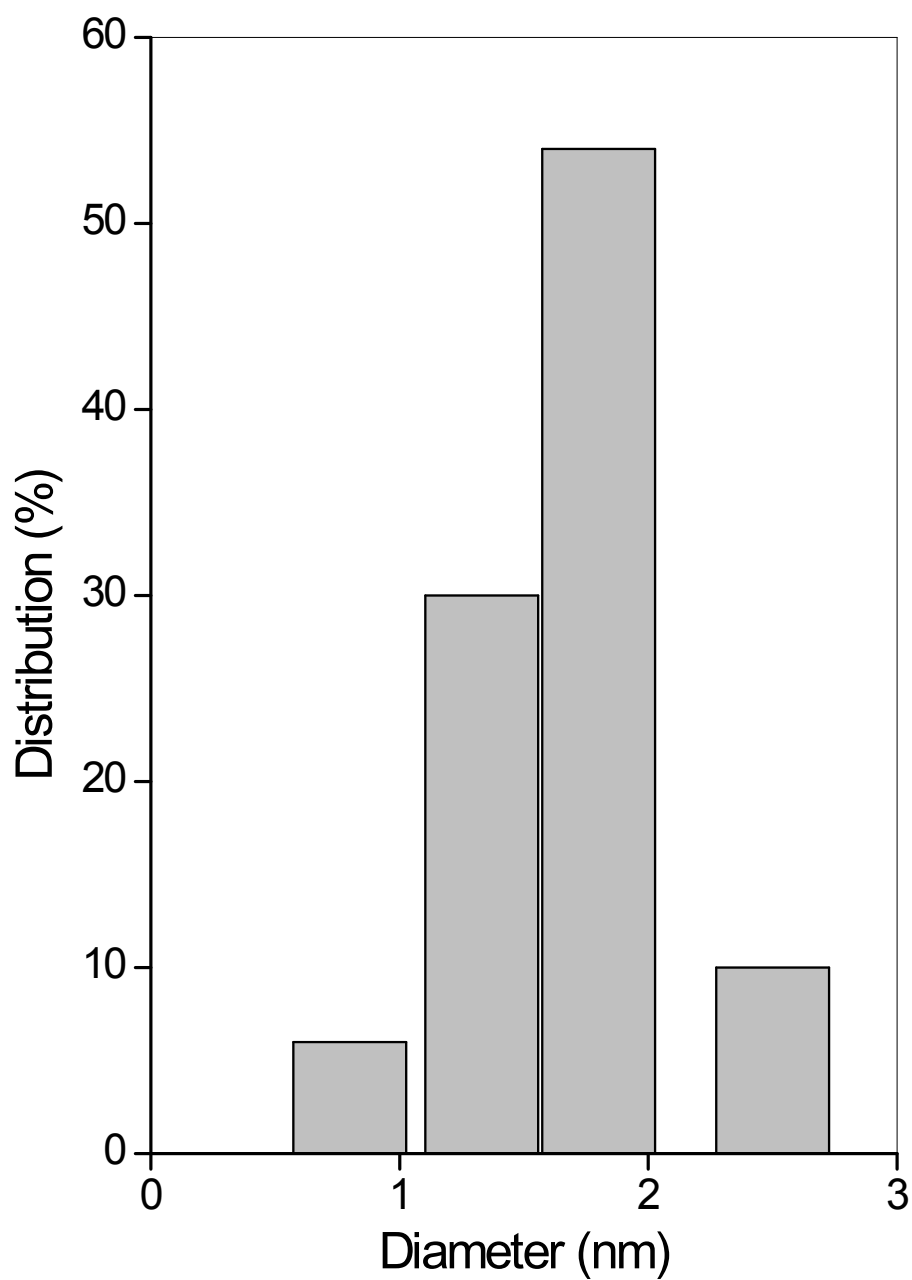

**Fig. S3.** Histogram of RuO<sub>2</sub>-Au/C nanocomposites derived from a mutual oxidation-reduction approach:  $\bar{d} = 1.62$  nm,  $\sigma = 0.24$  nm,  $\bar{\sigma} = 14.8\%$ .
